# Supplementary material for: Evolution and dynamics of the vertical temperature profile in anoligotrophic lake
Source: Copernicus journal article supplement (doi:10.5194/hess-2019-559), 2020-01-02

## SUPPLEMENT 1

Power spectral densities computed from hourly mean lake temperatures measured at individual depths during 6 July – 5 November 2018 (left) and during 1 – 20 September (right), where the latter correspond to weaker winds. Corresponding window lengths are 512 and 32, respectively. Black vertical line shows 24 h period.

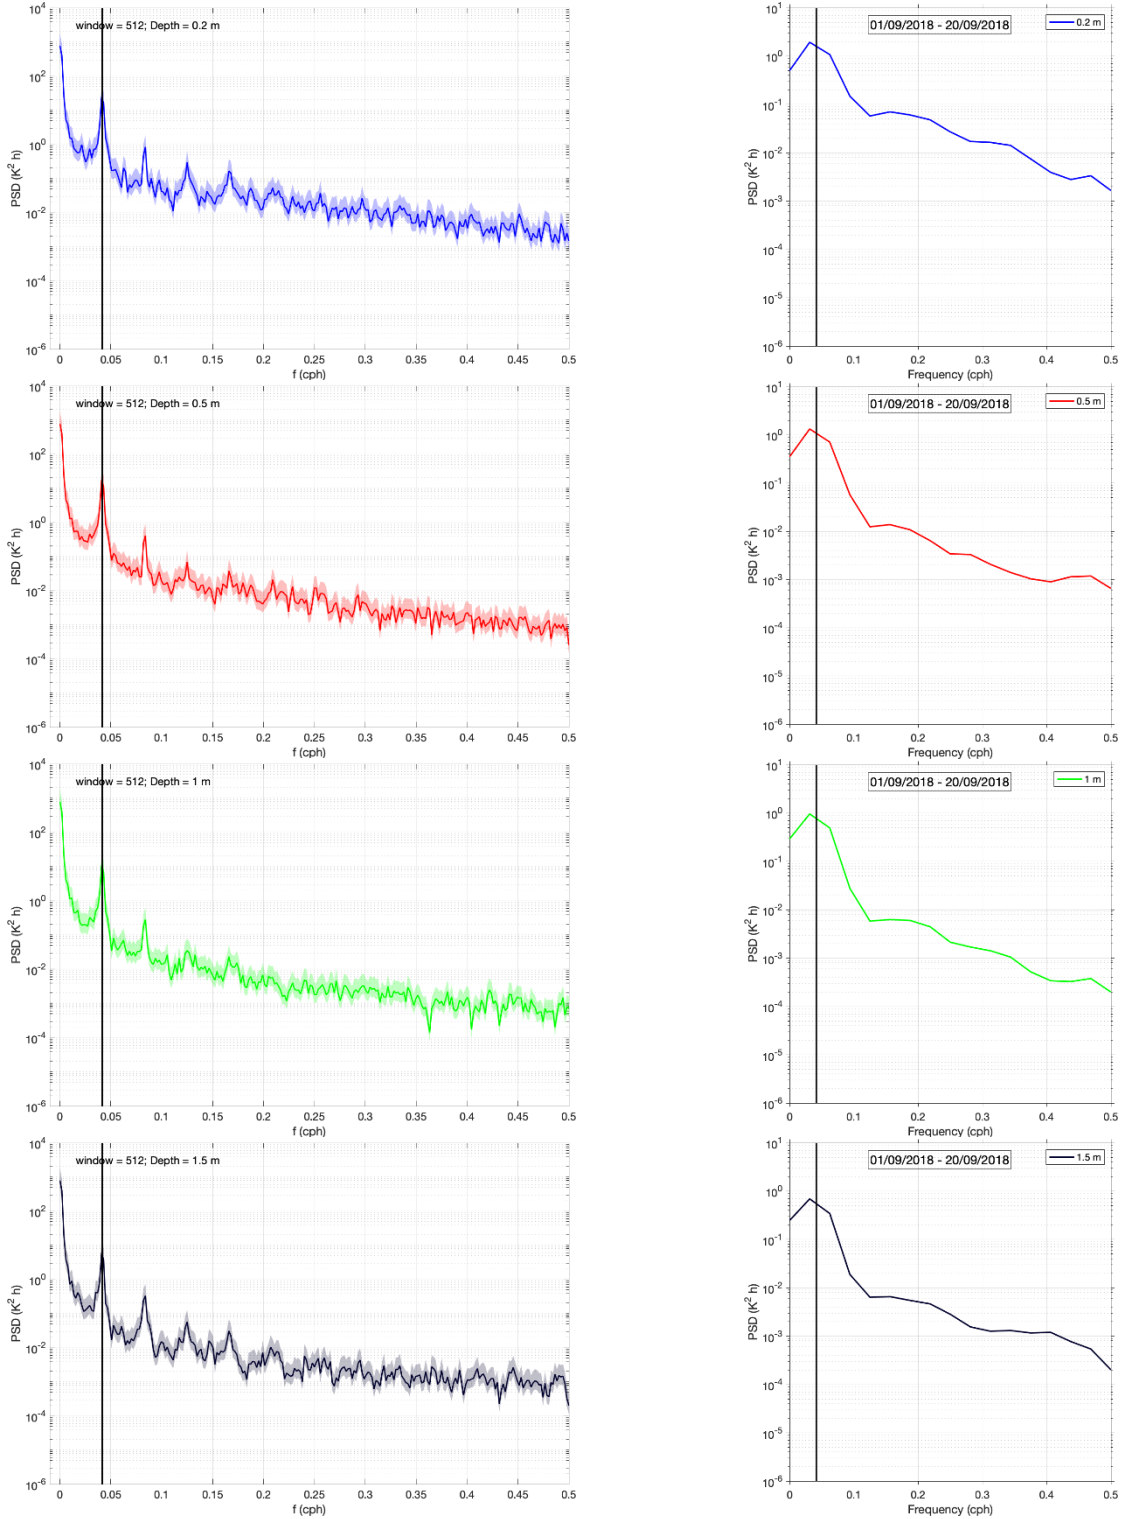

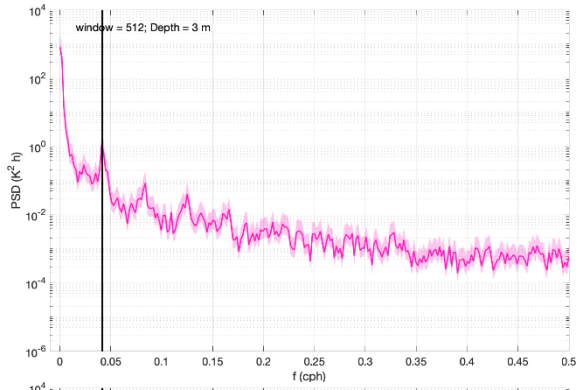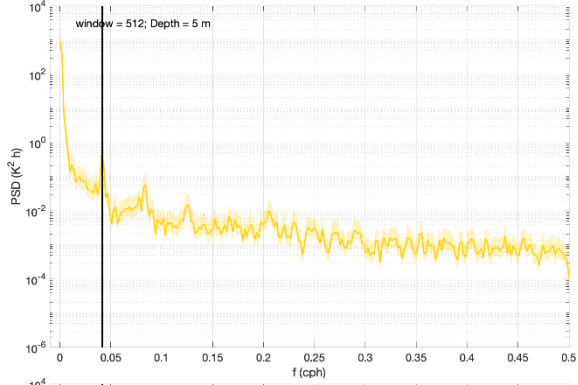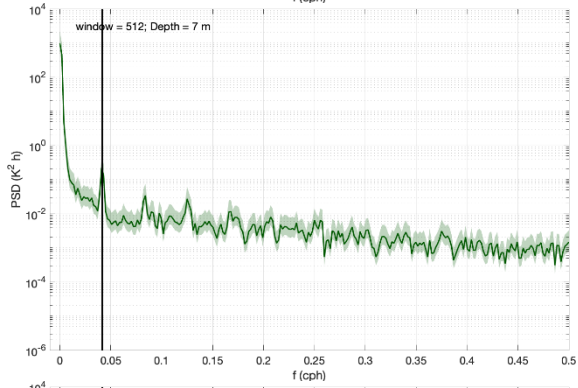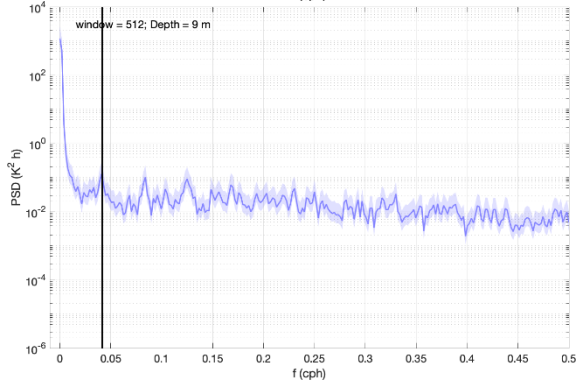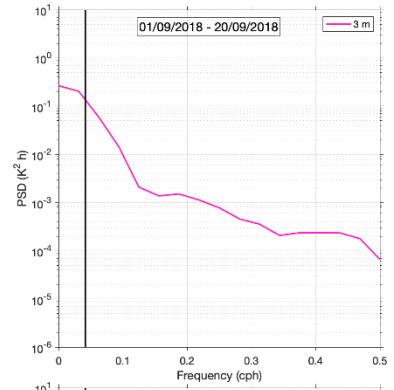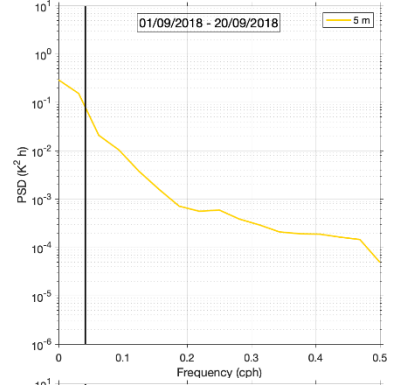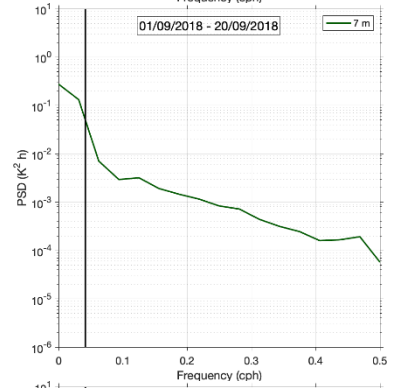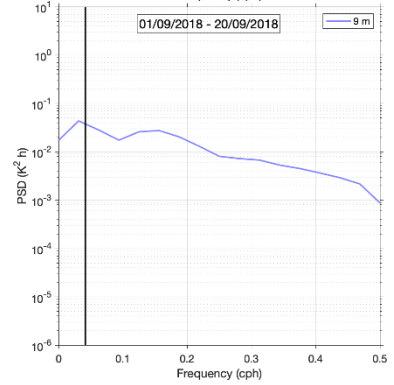

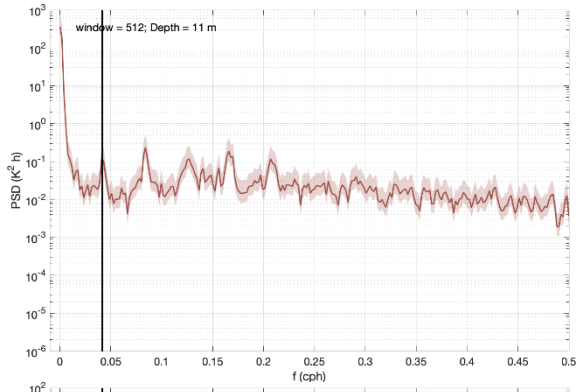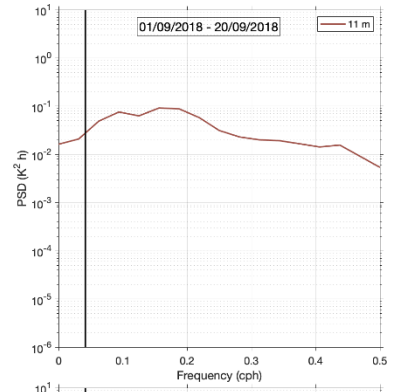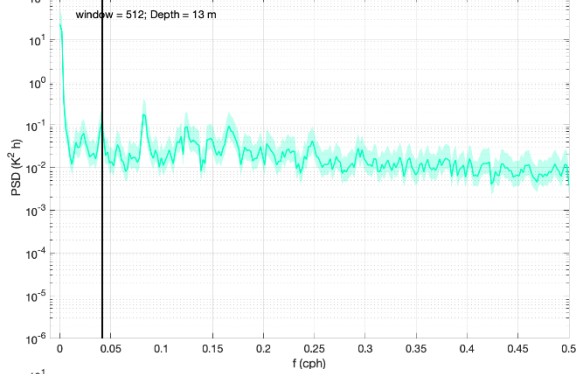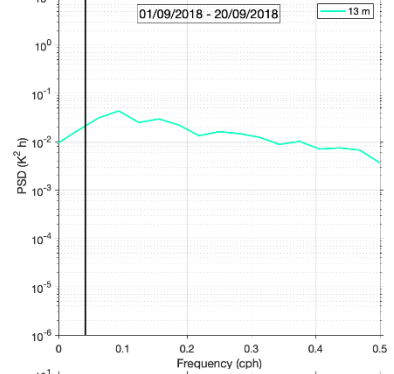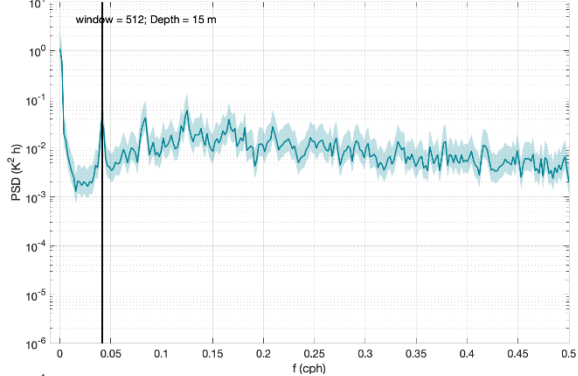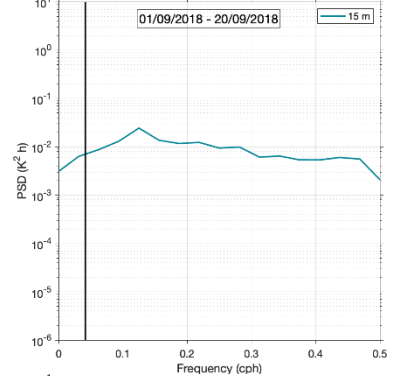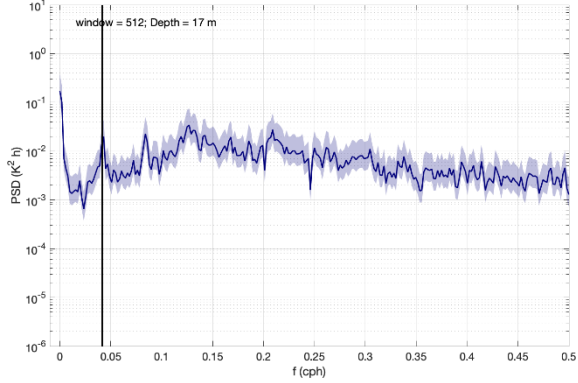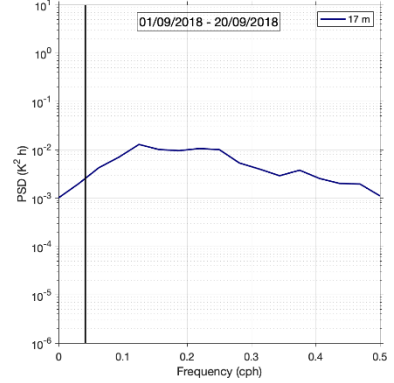

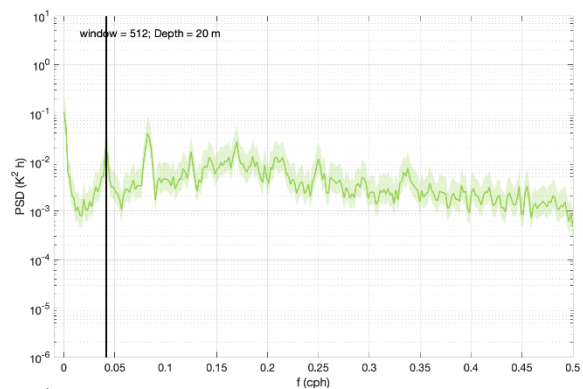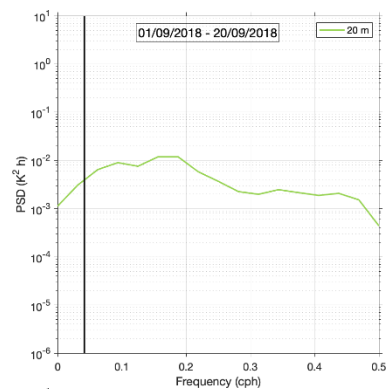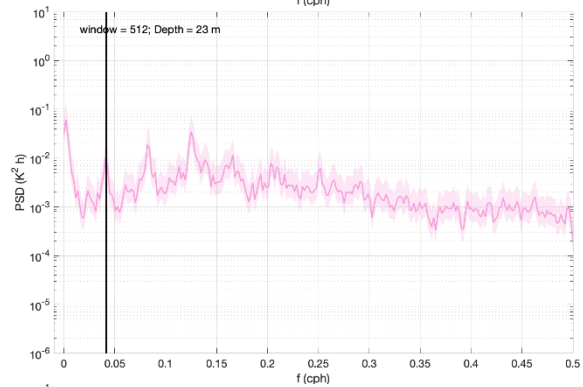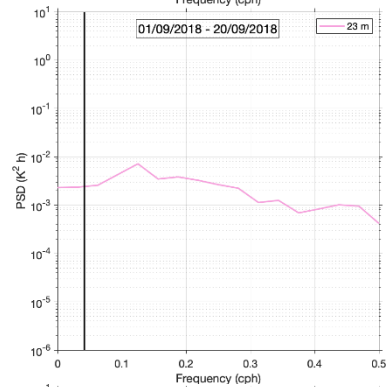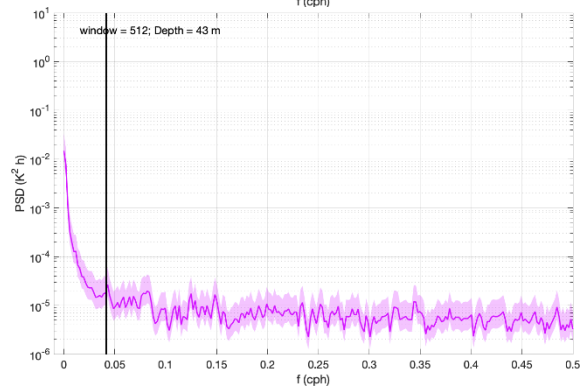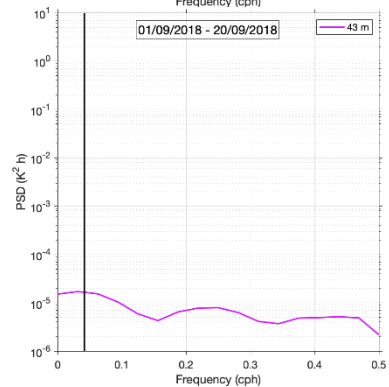

## SUPPLEMENT 2

Power spectral densities computed from 2-min mean lake temperatures measured at various depths during 6 July – 5 November 2018.

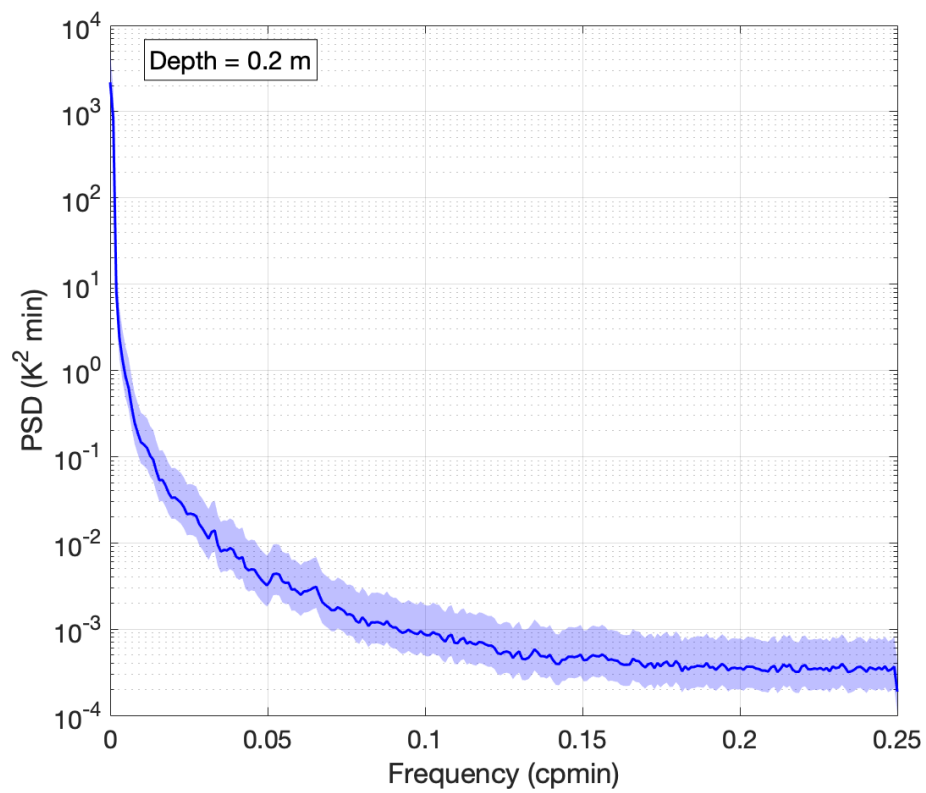

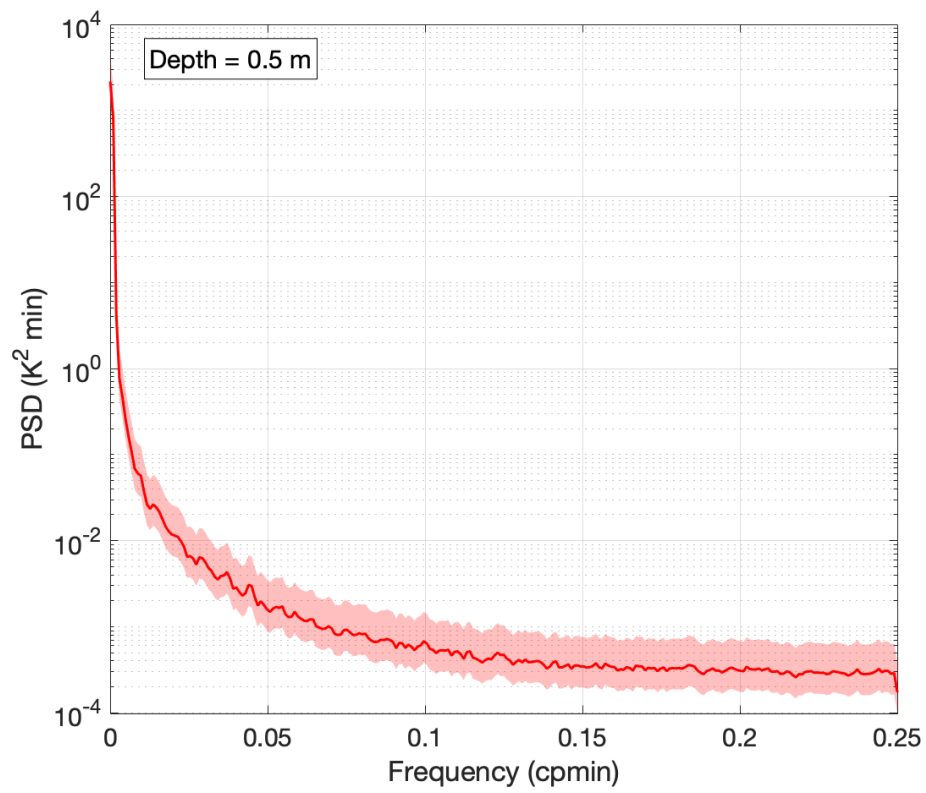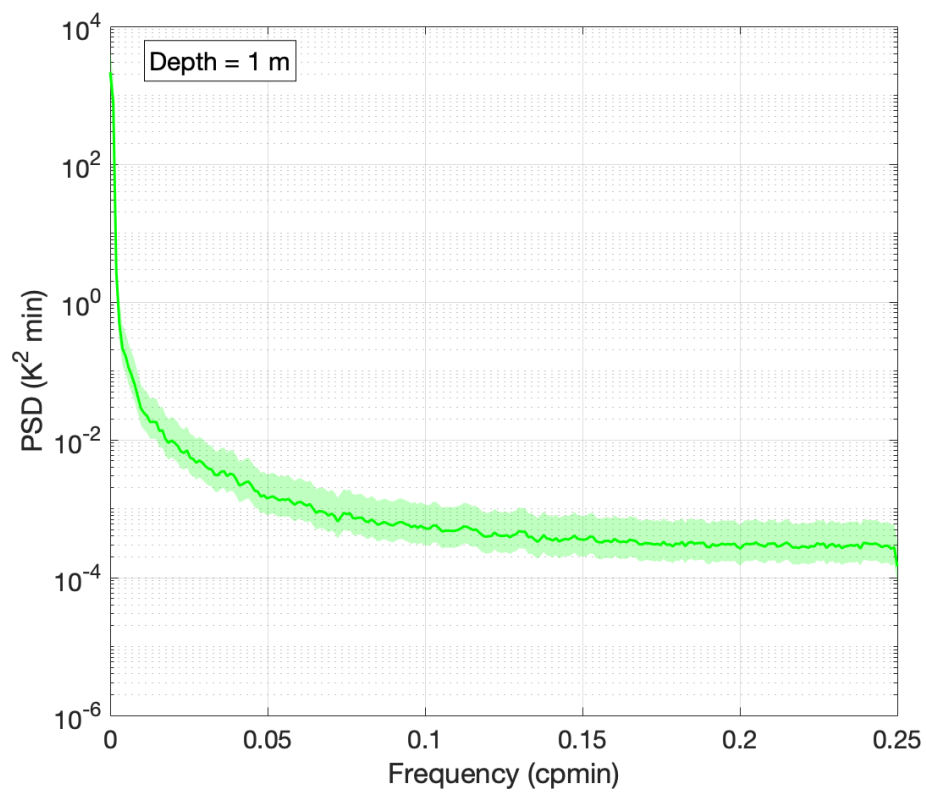

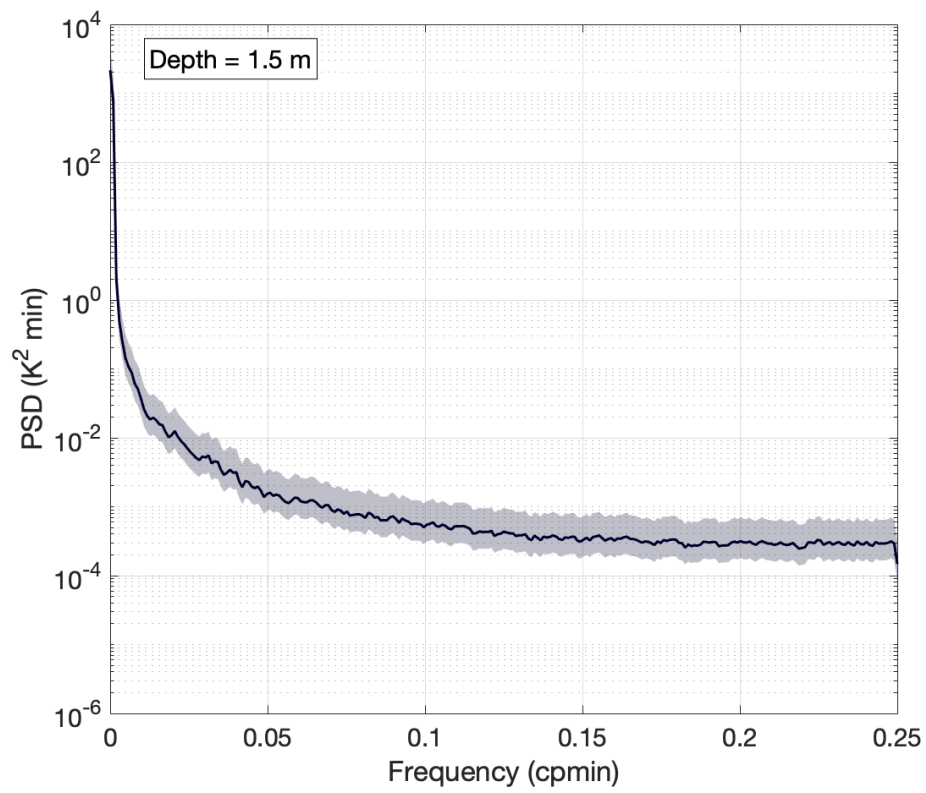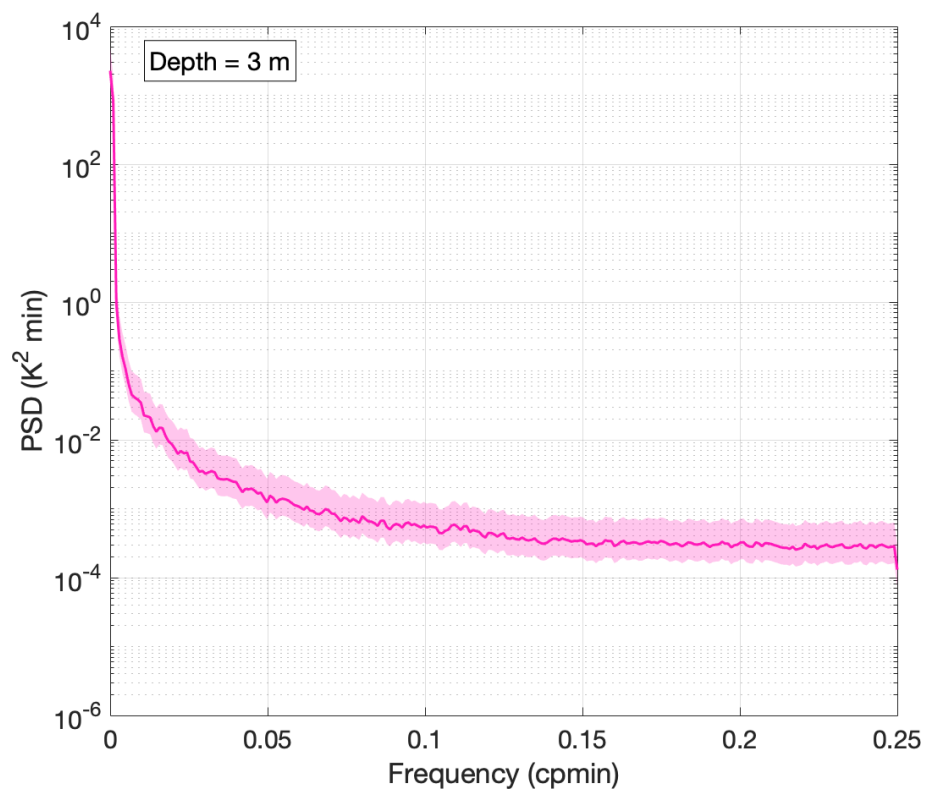

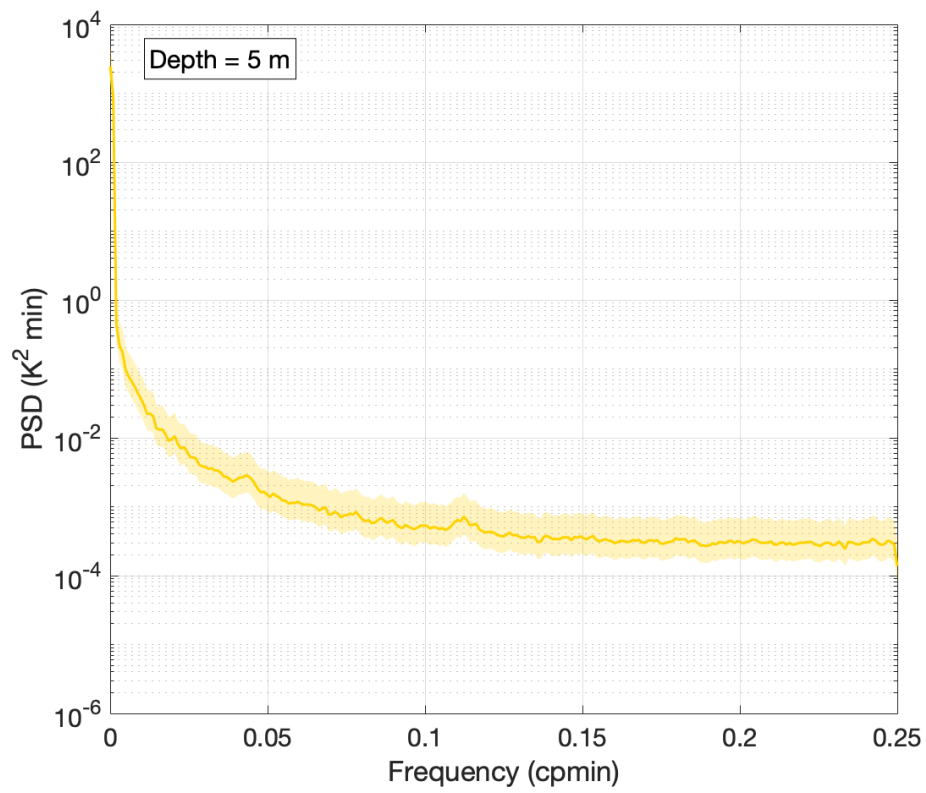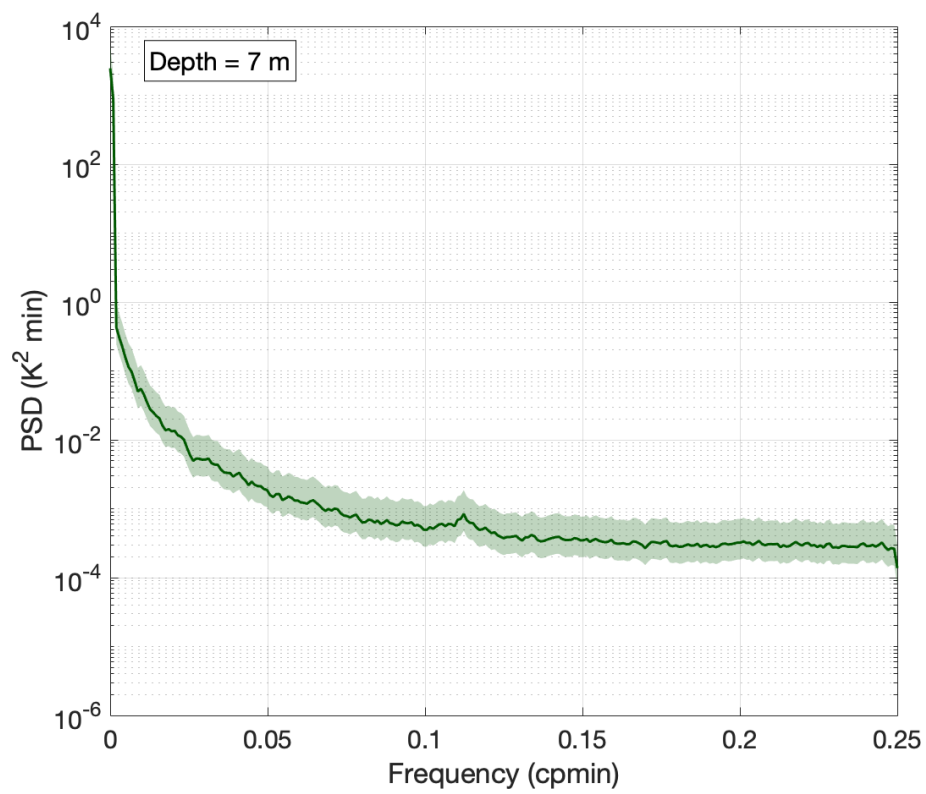



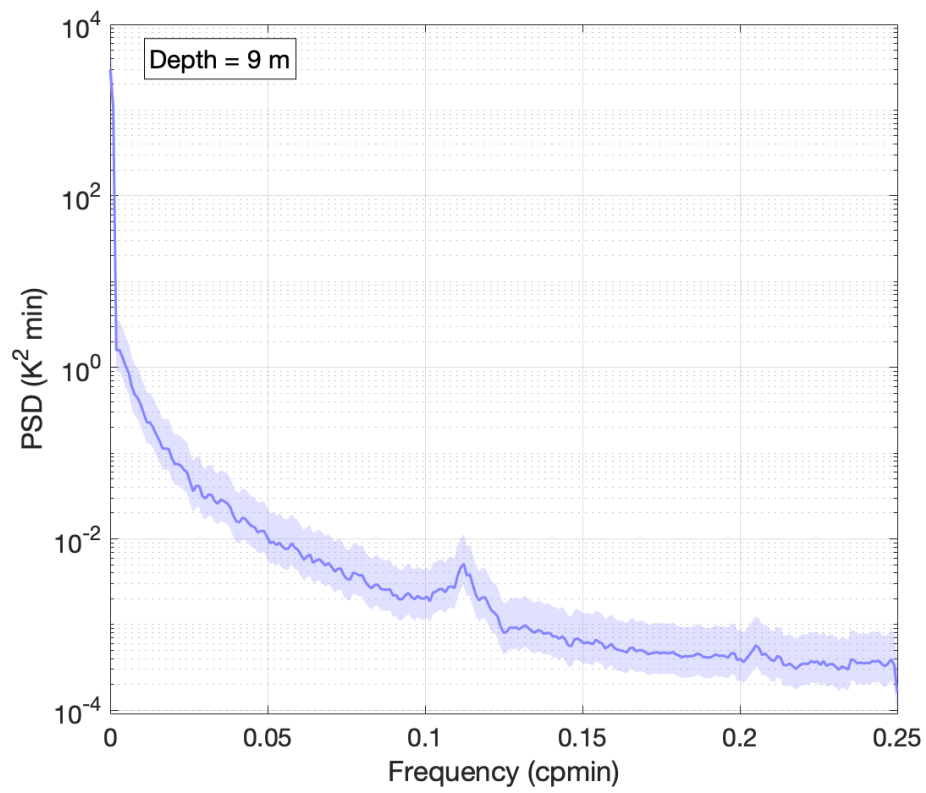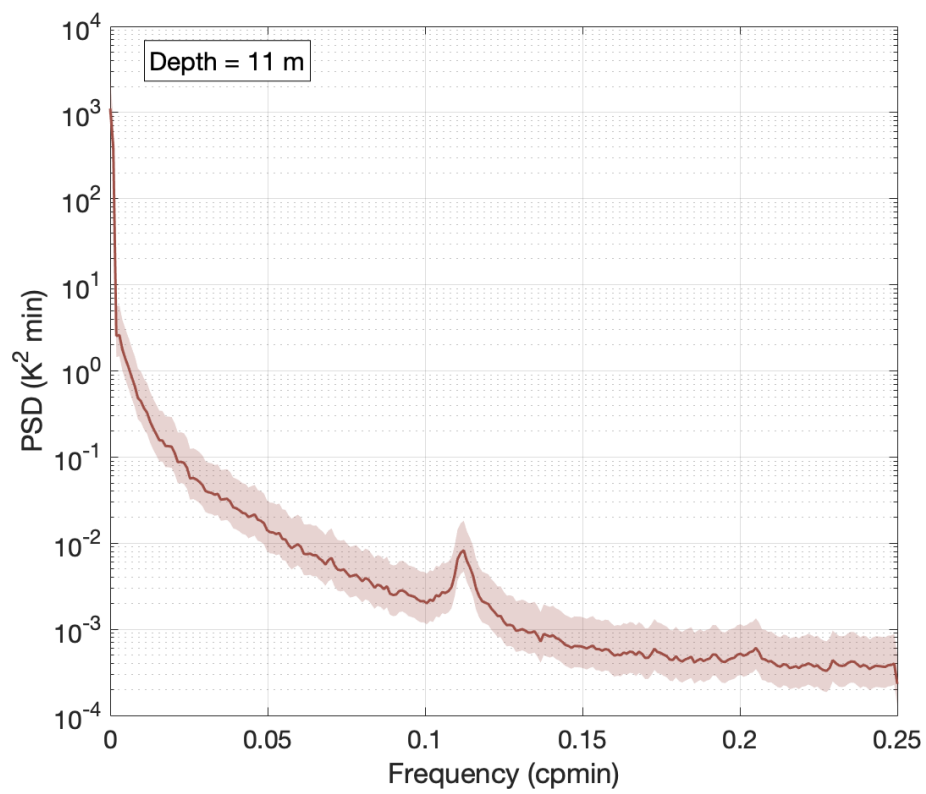

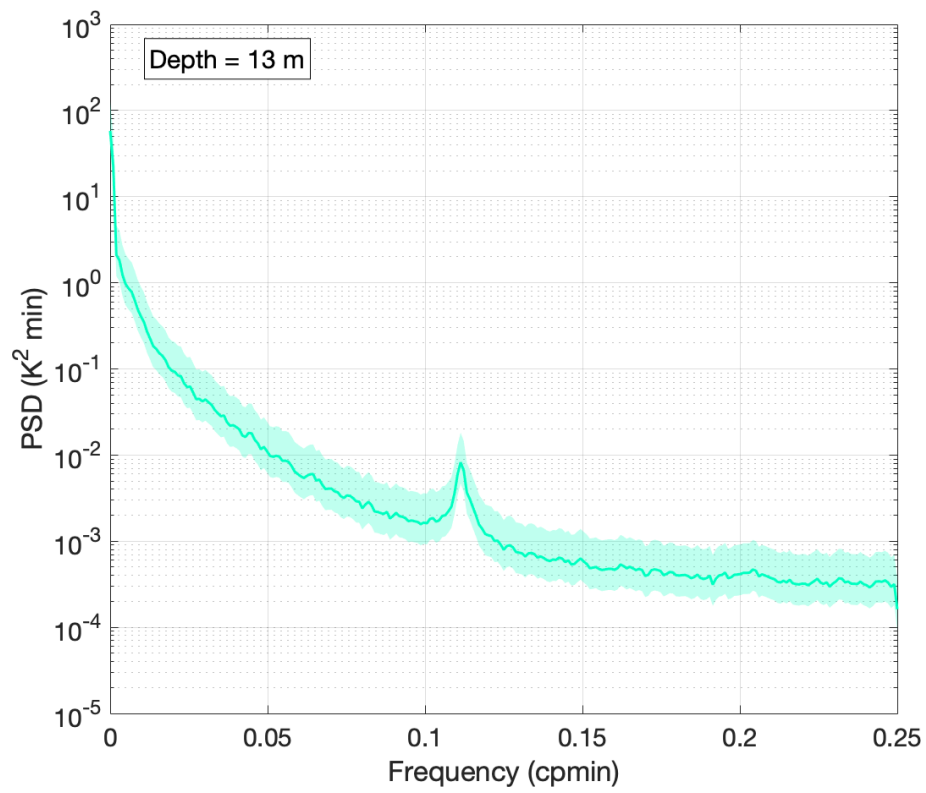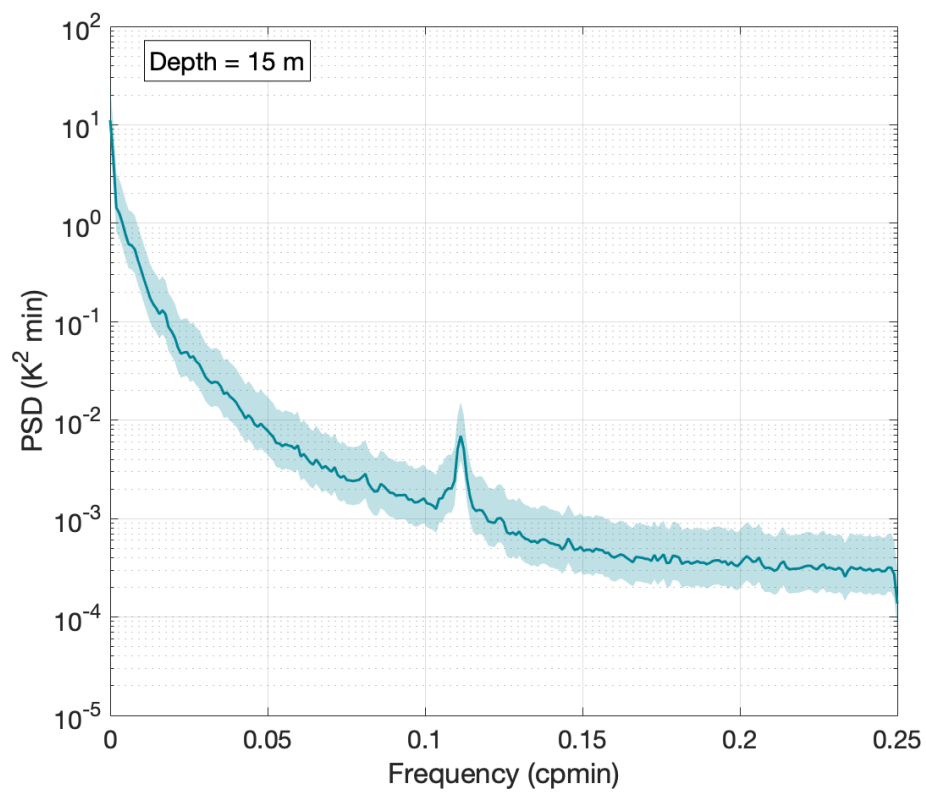

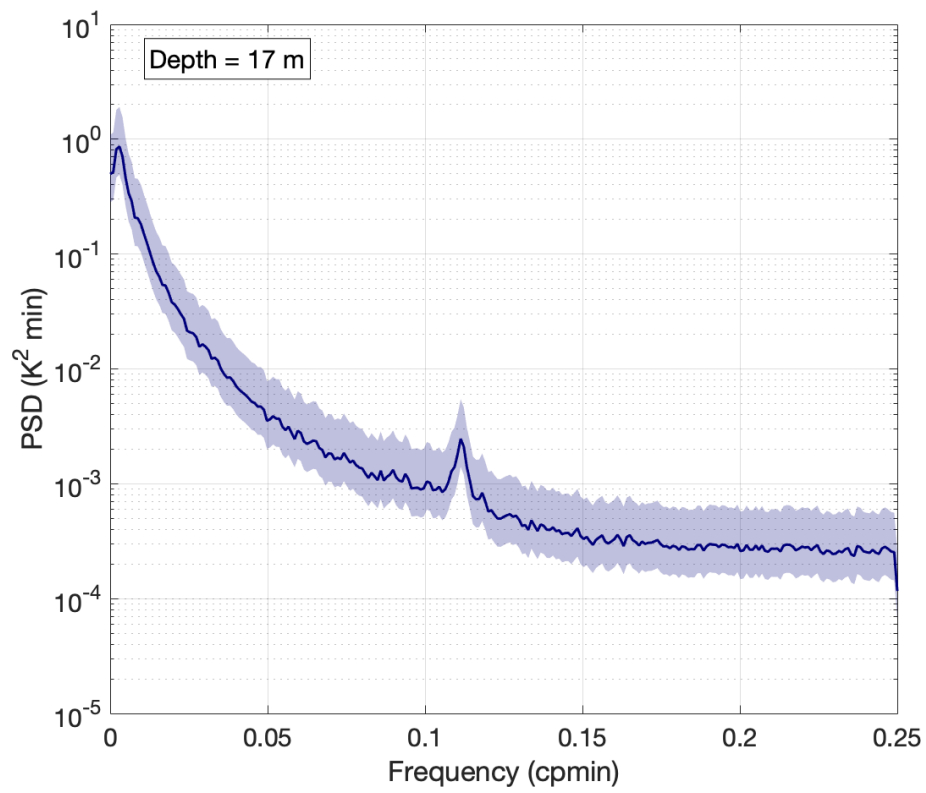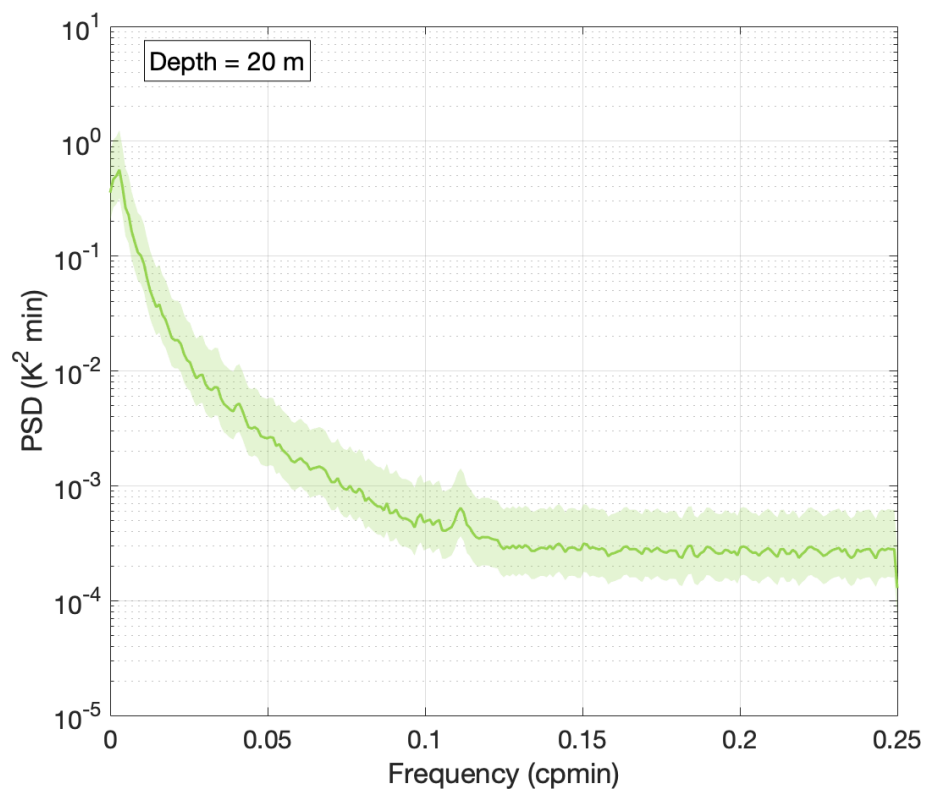

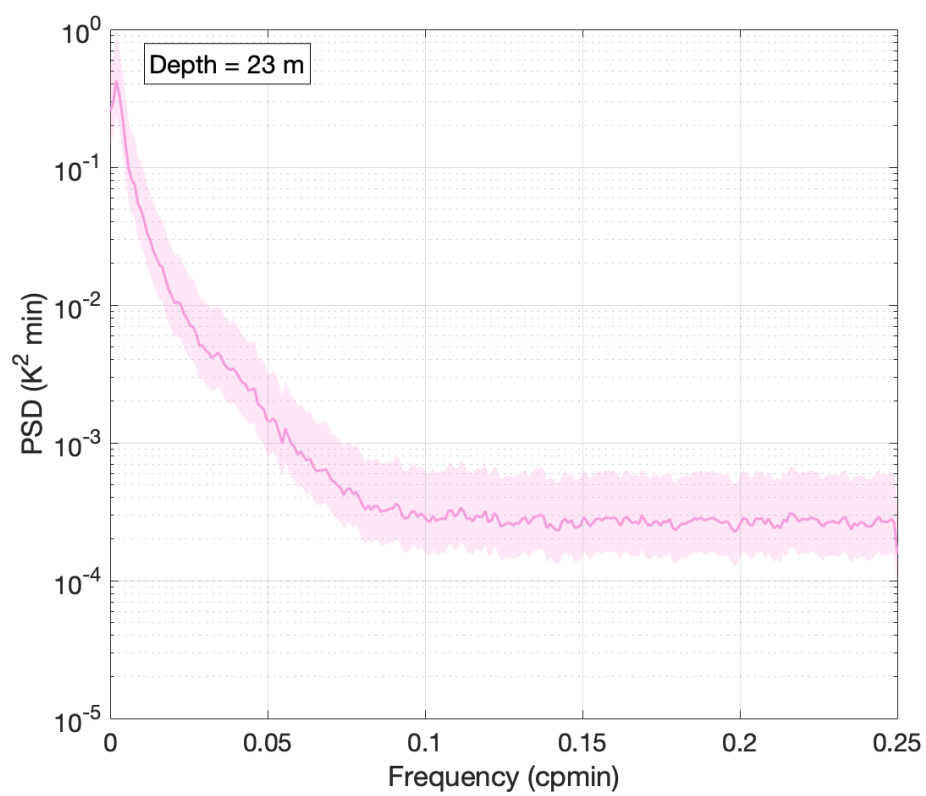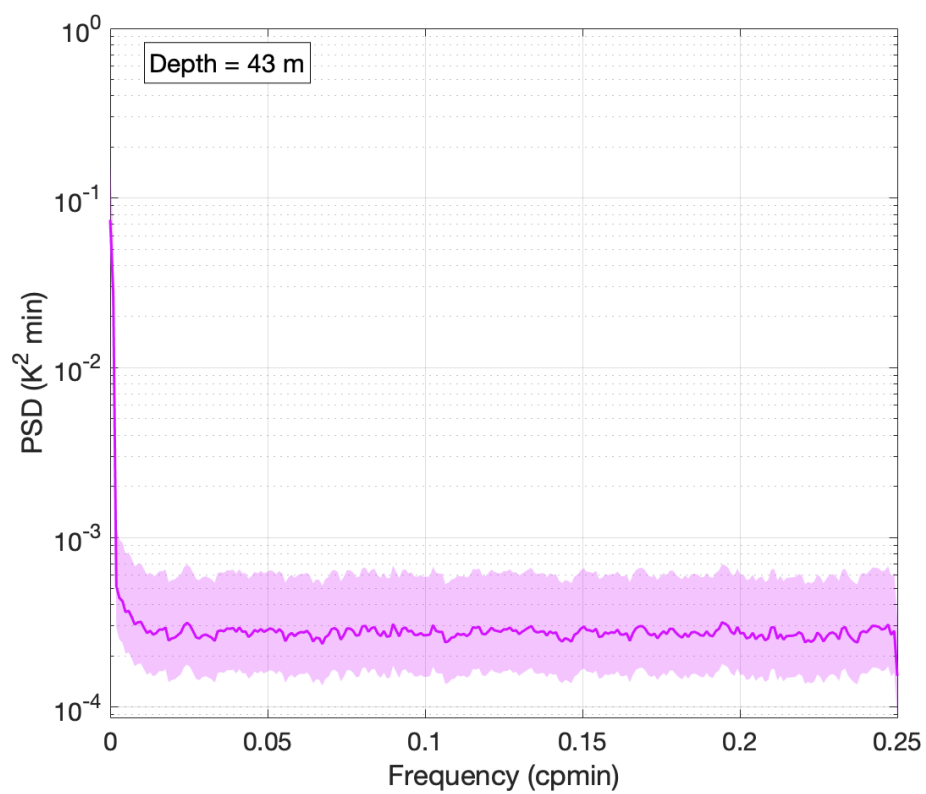

Supplement: Supplementary file [file hess-2019-559-AC3-supplement.pdf]
