# Supplementary material for: Evolution and dynamics of the vertical temperature profile in anoligotrophic lake
Source: Copernicus journal article supplement (doi:10.5194/hess-2019-559), 2020-01-02

Power spectral densities computed from 2-min mean lake temperatures measured at various depths during 6 July – 5 November 10 2018.

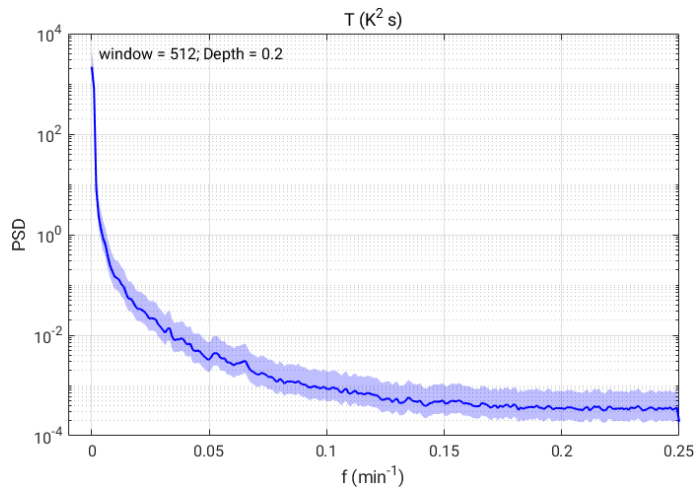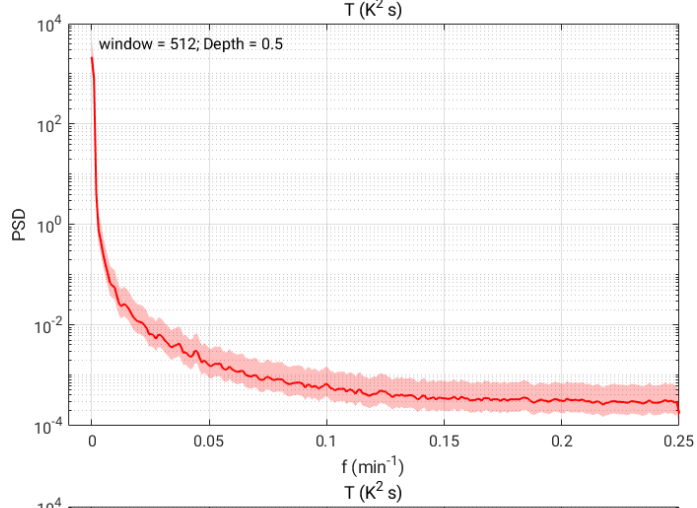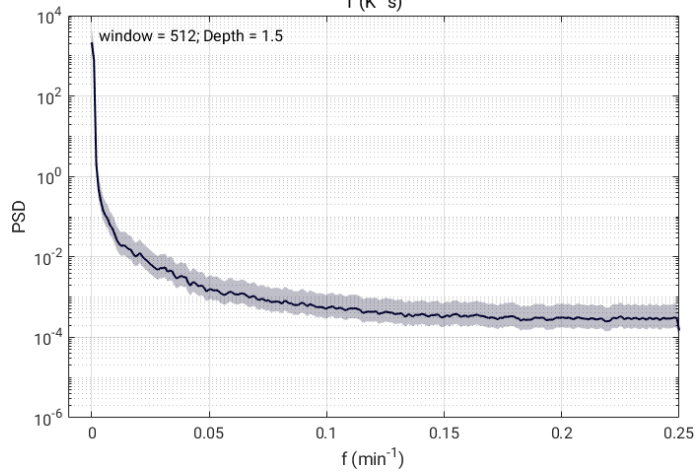

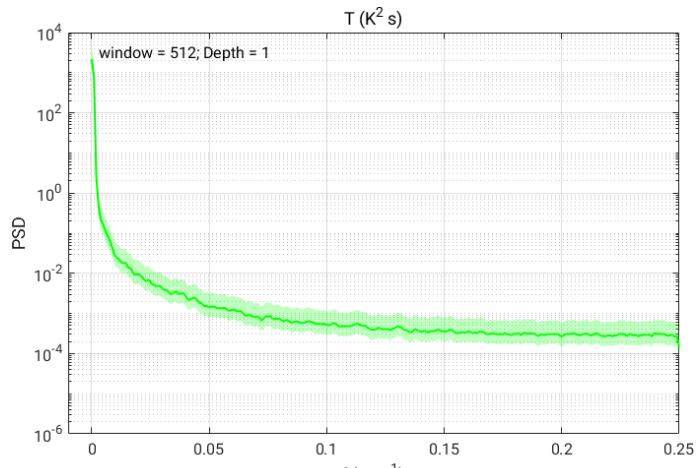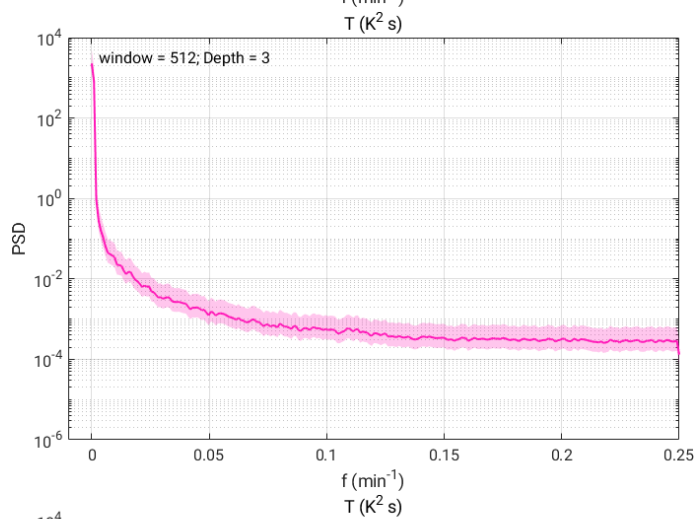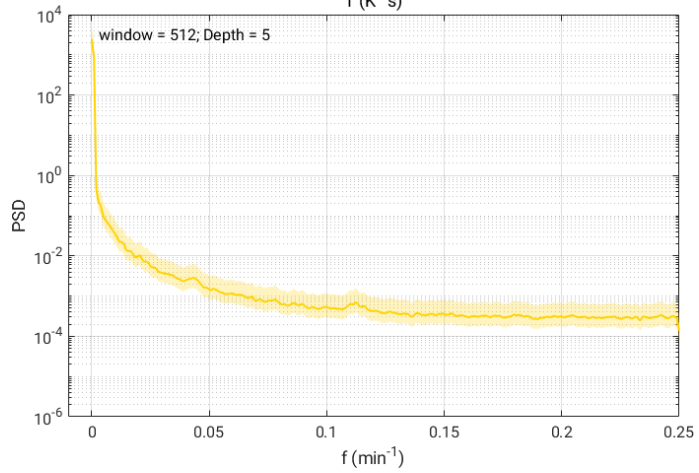

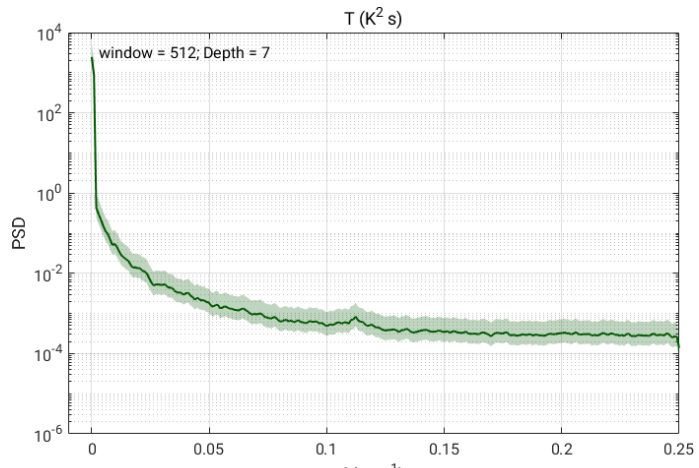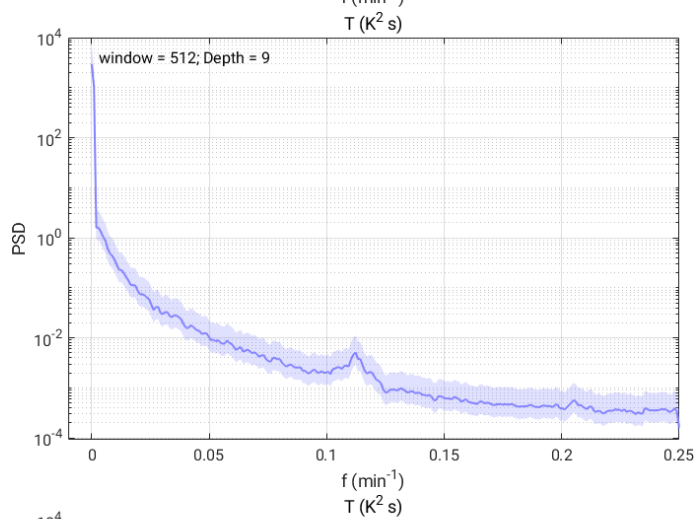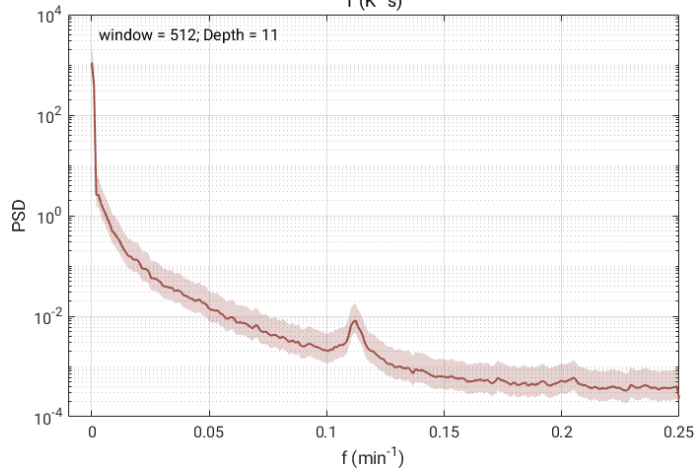

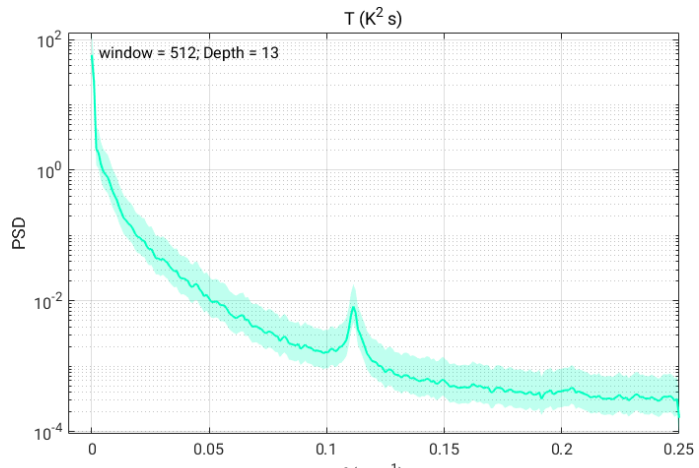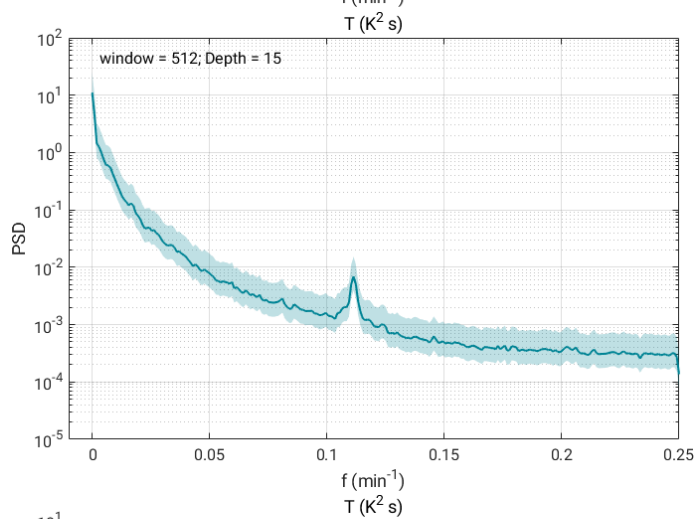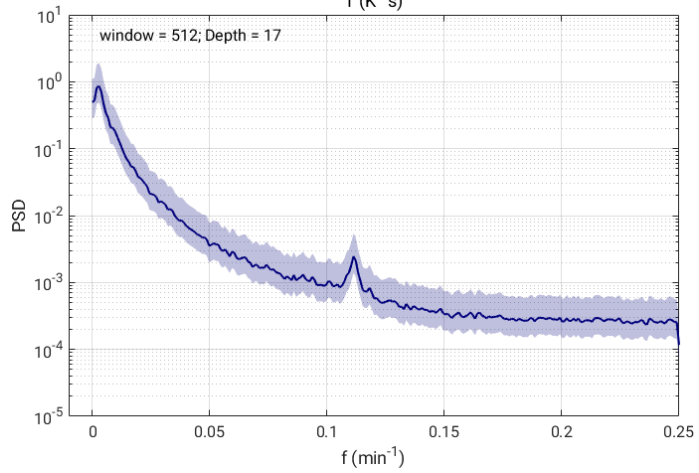

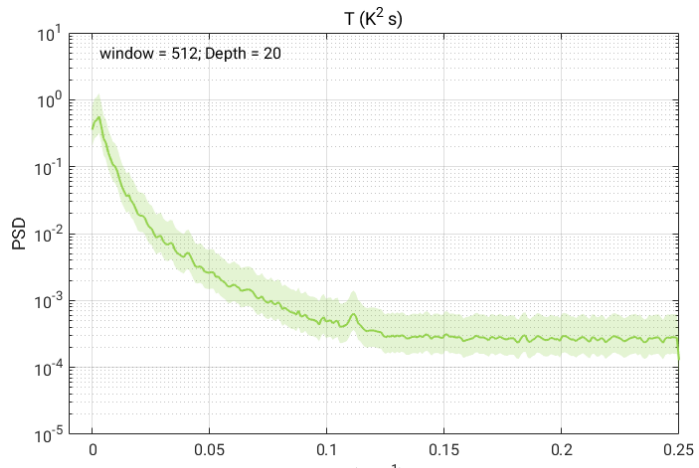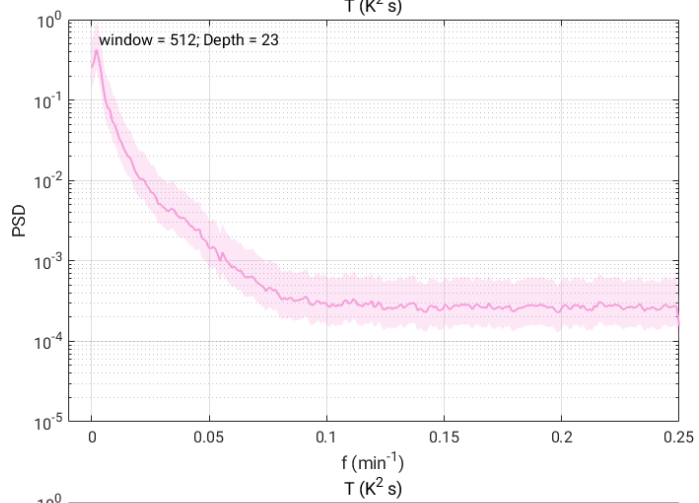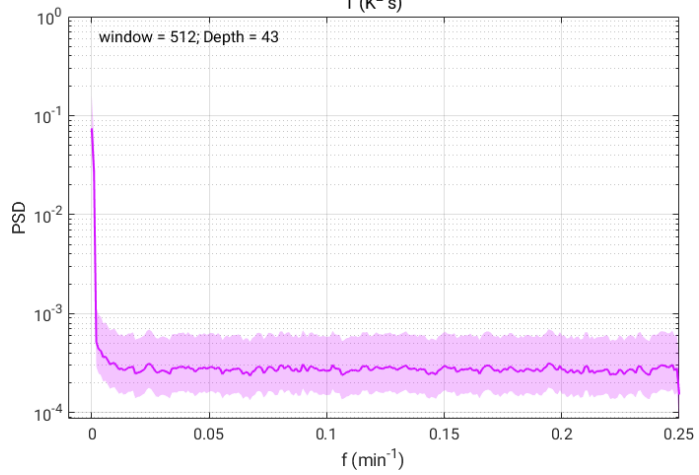

Supplement: Supplementary file 1 [file hess-2019-559-supplement.pdf]
